# Supplementary material
Source: PubMed Central journal article supplement (PMC3572288)
Supplement: NIHMS419474-supplement-Supp_FigureS1-S12.pdf [file NIHMS419474-supplement-Supp_FigureS1-S12.pdf]

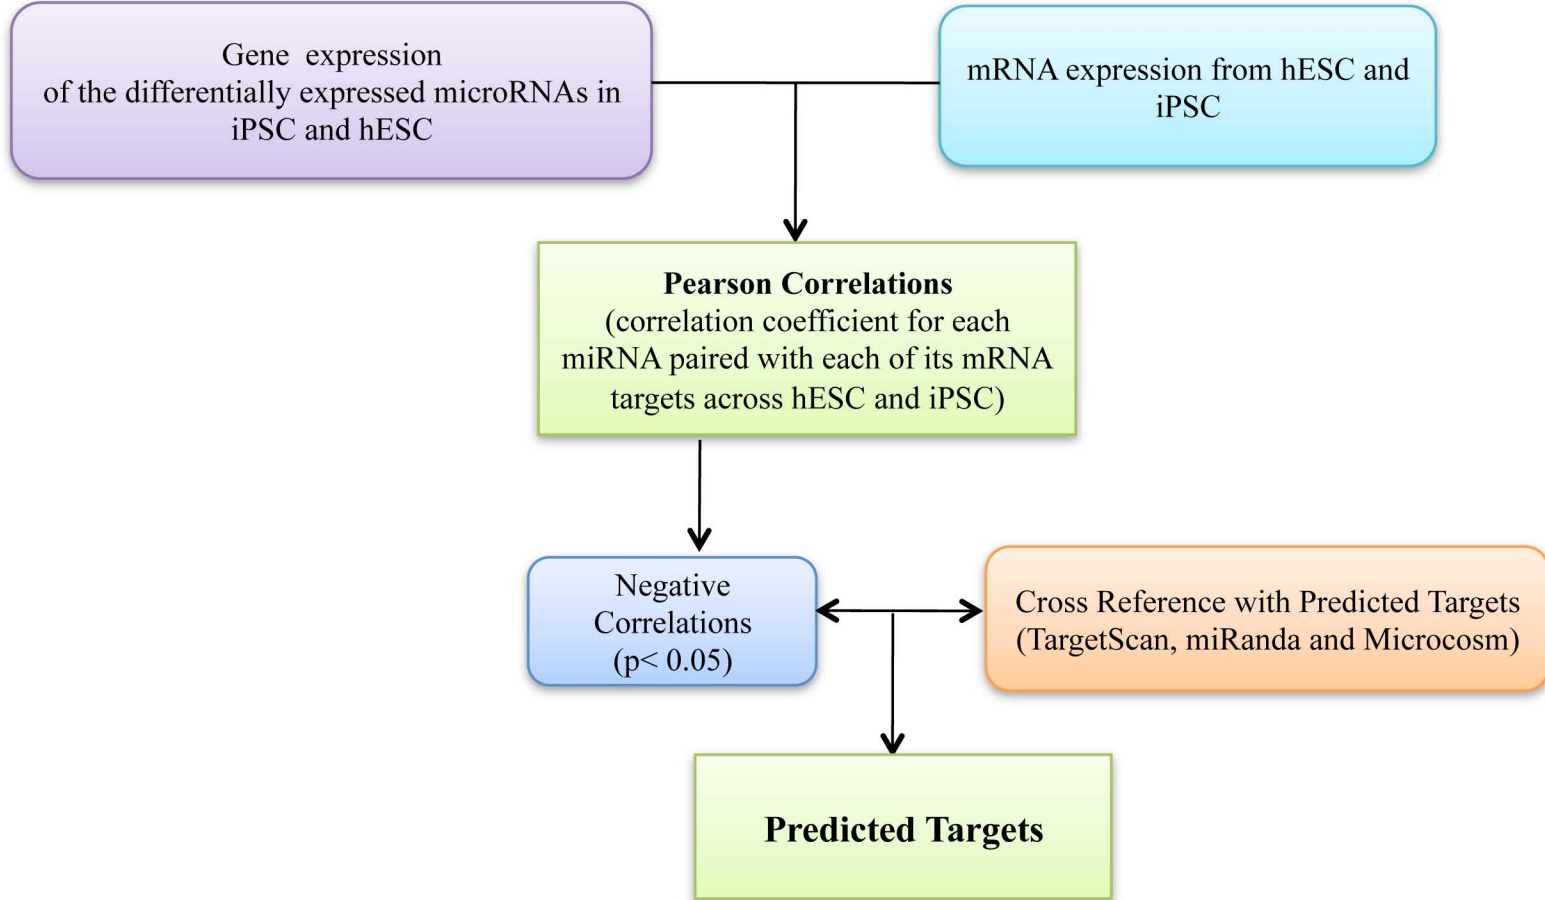

**Figure S1**

**(A)**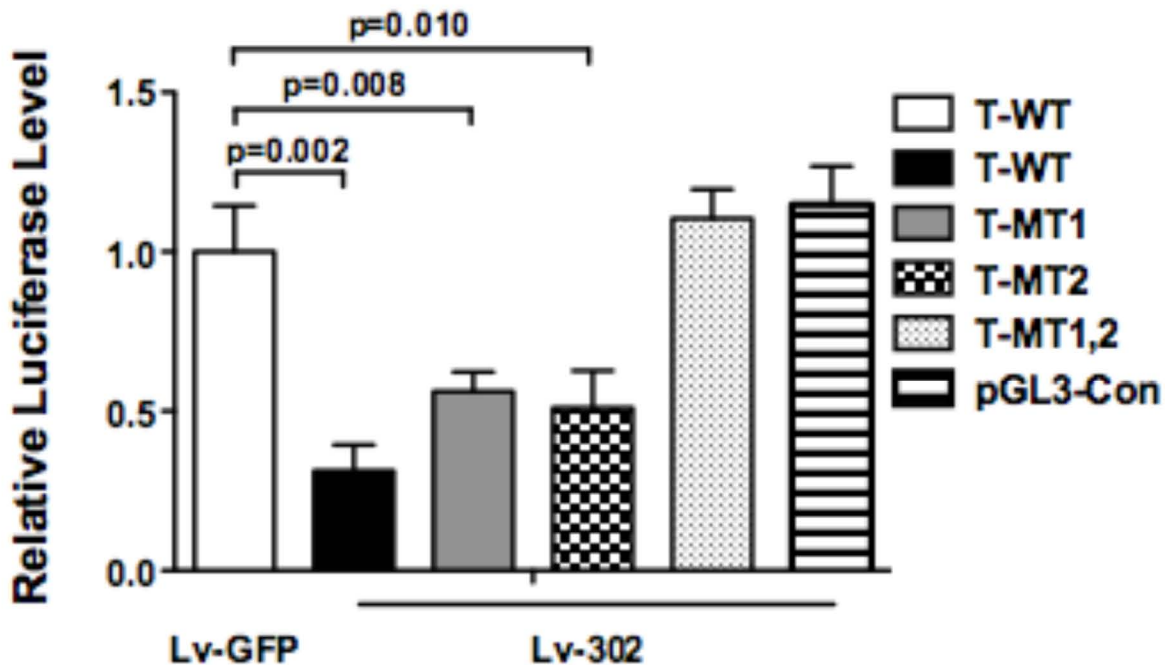**(B)**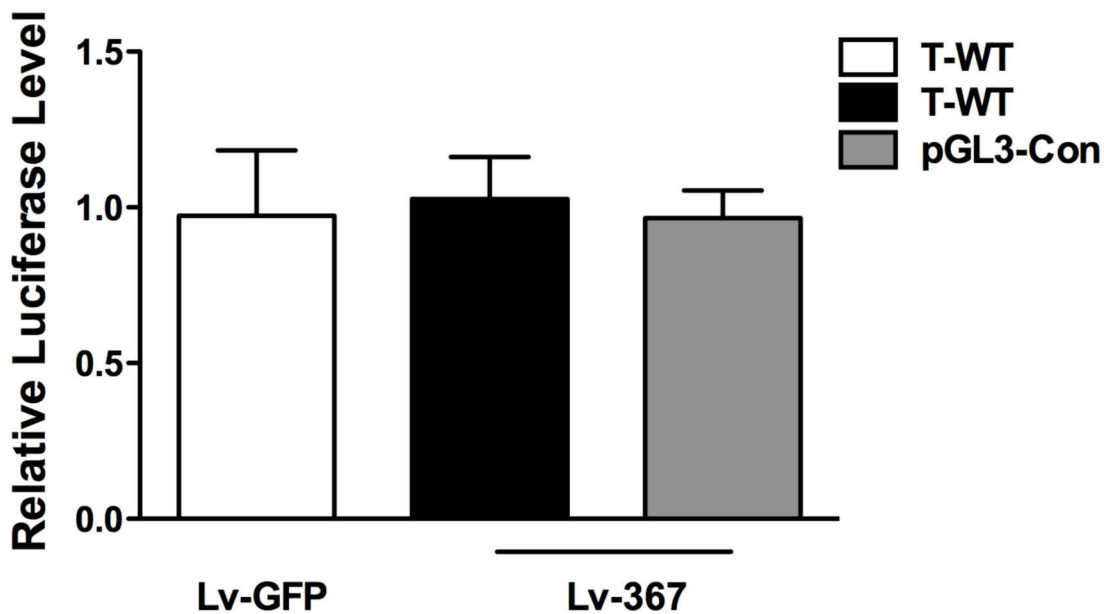**Figure S2**

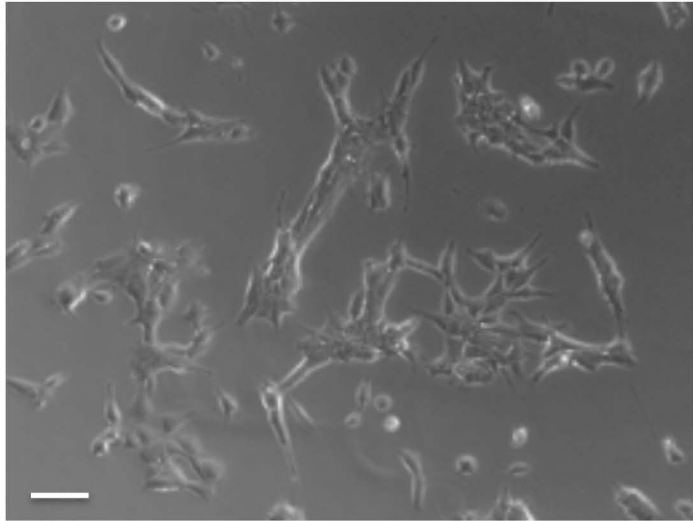

Brightfield

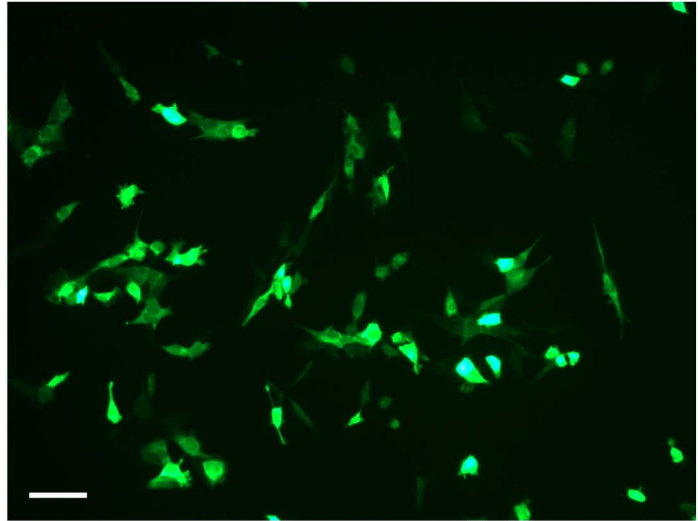

GFP

**Figure S3**

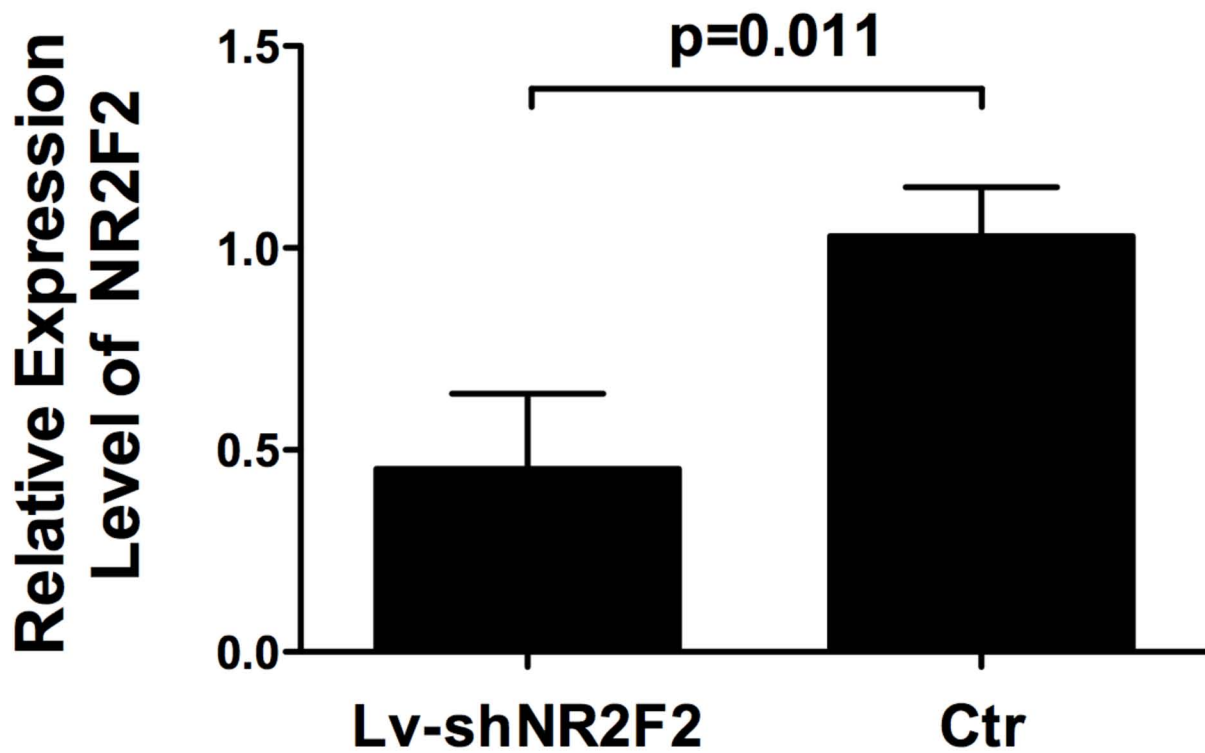

**Figure S4**

(A)

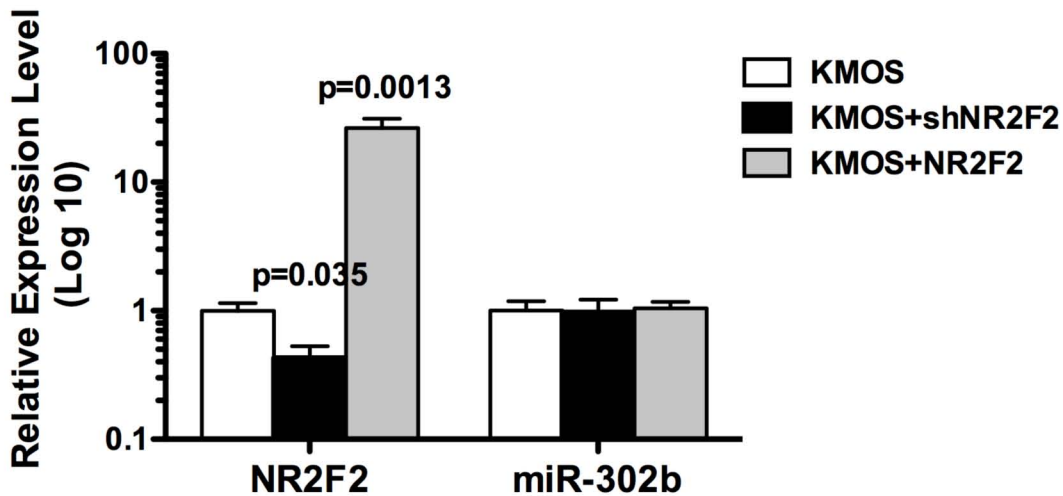

(B)

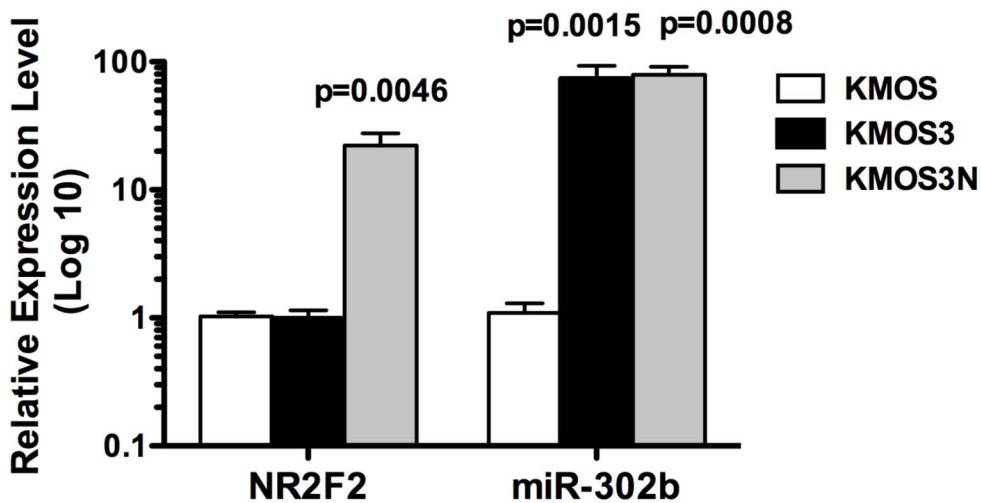

Figure S5

**AKP****TRA-1-60****DAPI**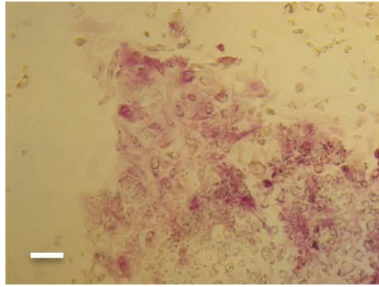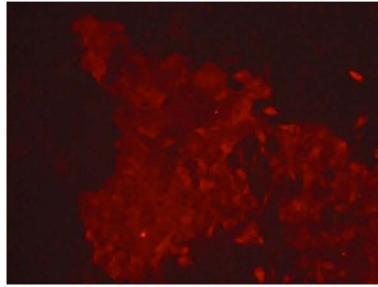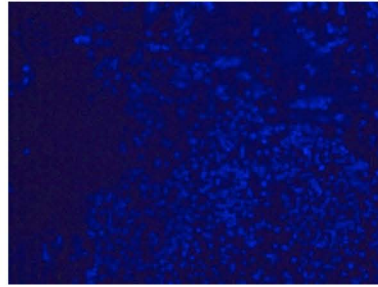**AKP<sup>+</sup>**  
**TRA-1-60<sup>+</sup>**  
**MORPHOLOGY<sup>-</sup>**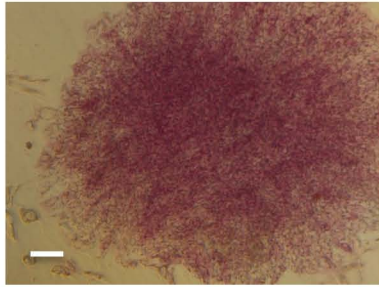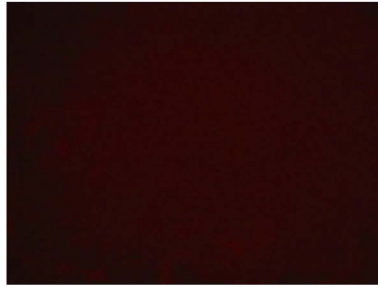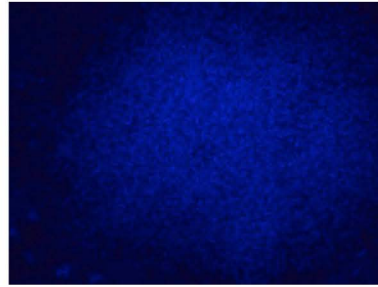**AKP<sup>+</sup>**  
**TRA-1-60<sup>-</sup>**  
**MORPHOLOGY<sup>+</sup>**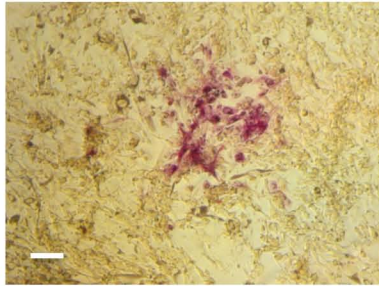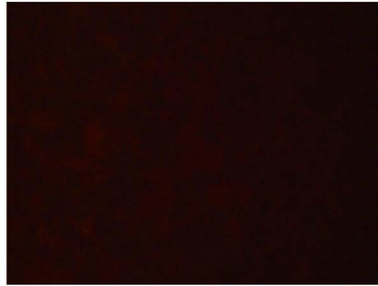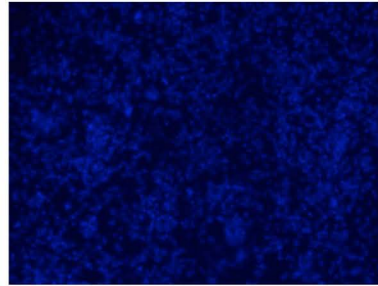**AKP<sup>+</sup>**  
**TRA-1-60<sup>-</sup>**  
**MORPHOLOGY<sup>-</sup>**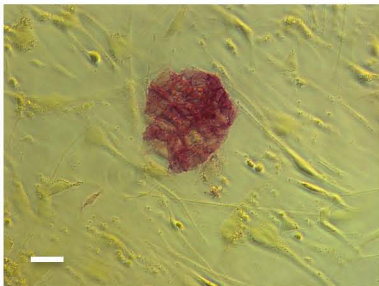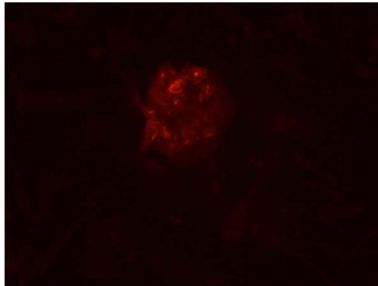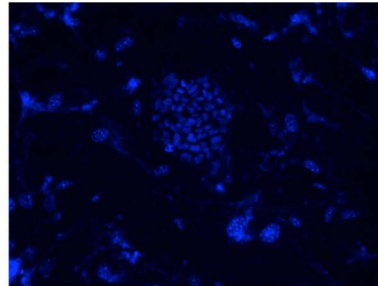**AKP<sup>+</sup>**  
**TRA-1-60<sup>+</sup>**  
**MORPHOLOGY<sup>+</sup>****Figure S6**

**KMOS**

**KMOS3**

**Endoderm**

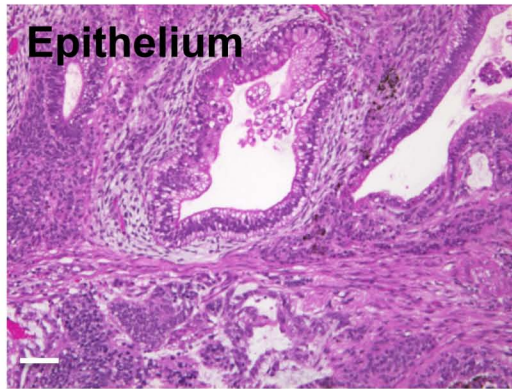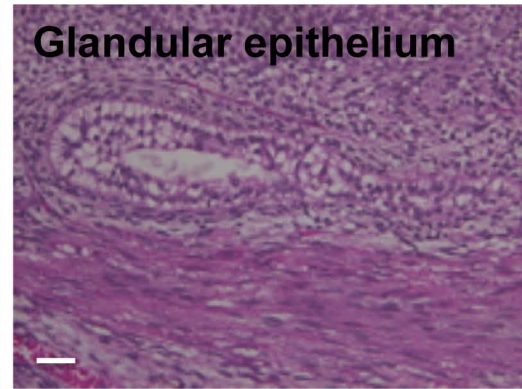

**Mesoderm**

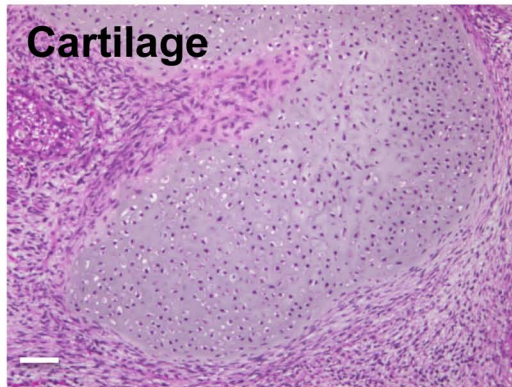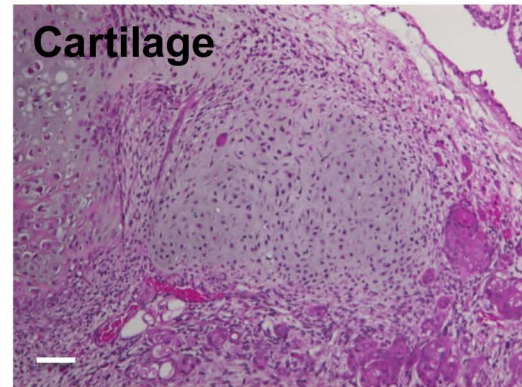

**Ectoderm**

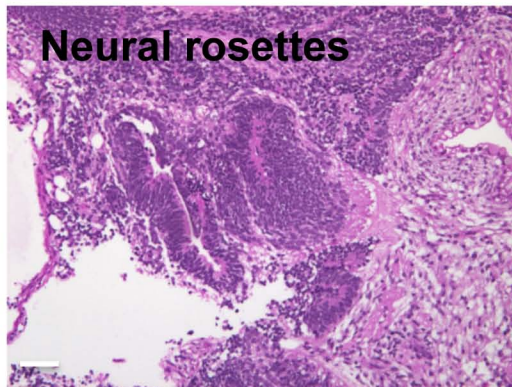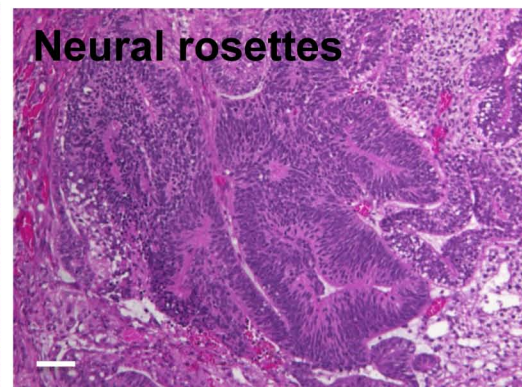

**Figure S7**

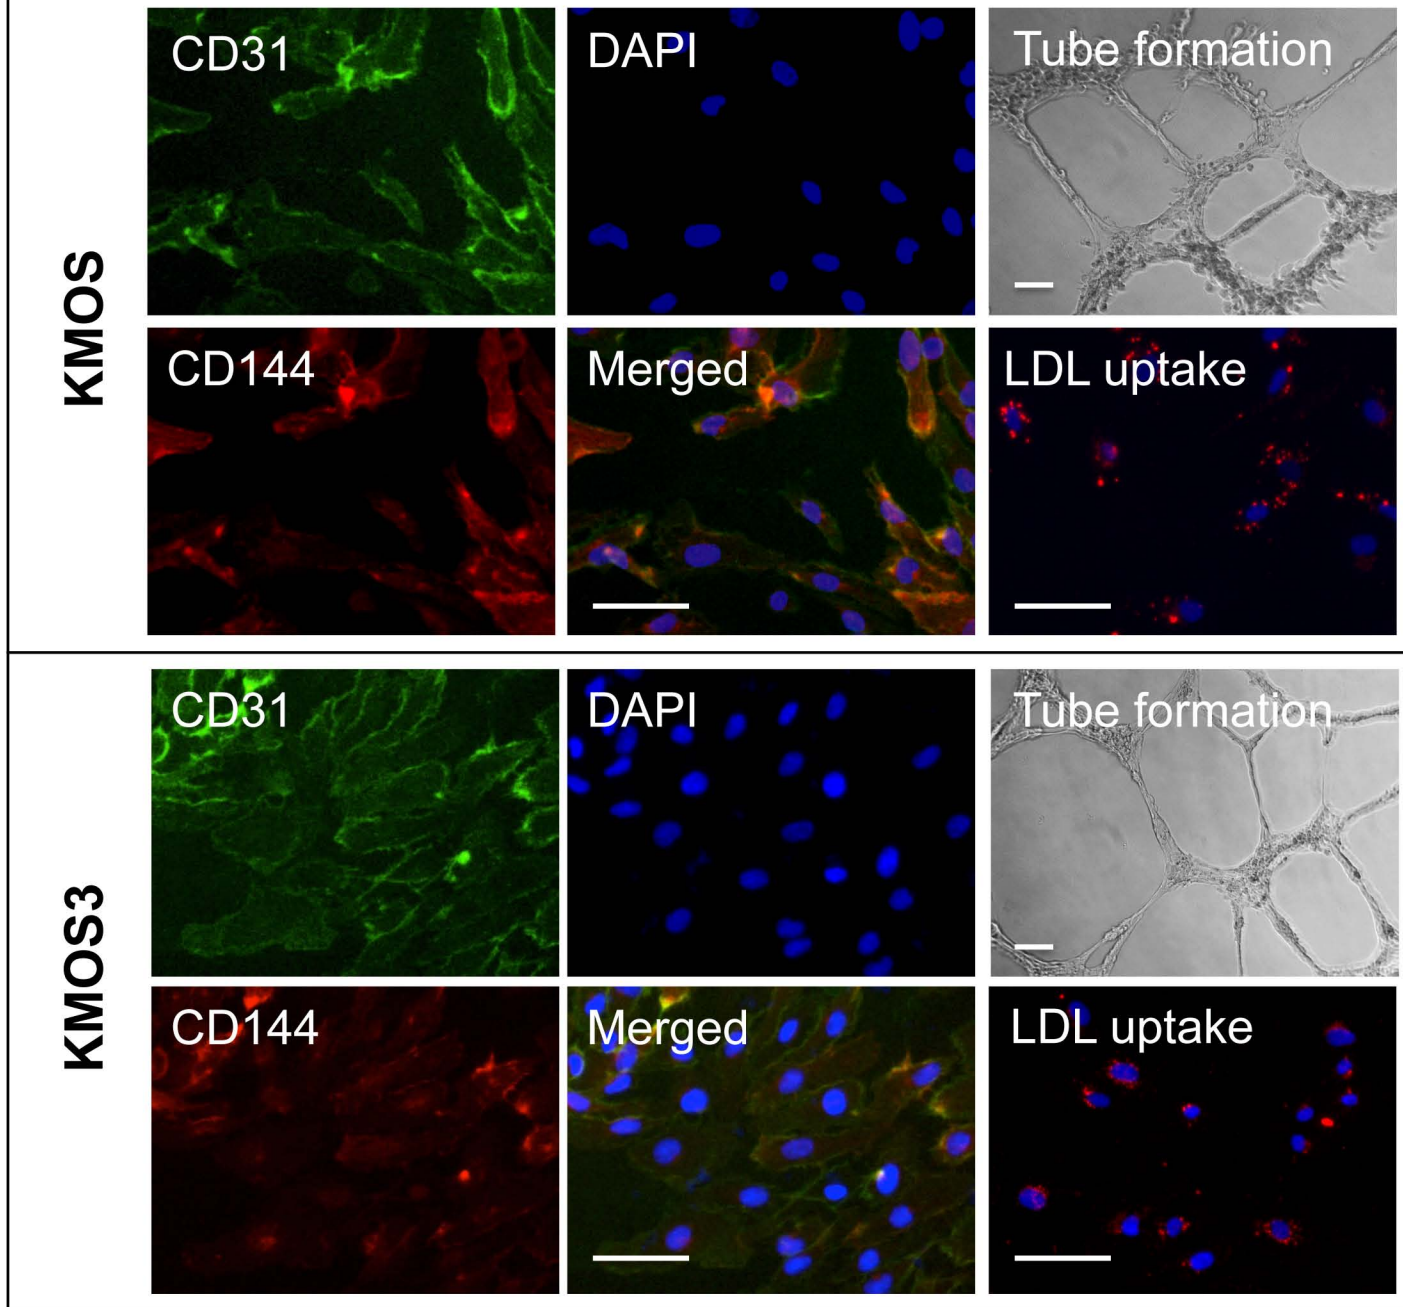

**Figure S8**



**KMOS**

**KMOS3**

**TNNT2**

**TNNT2**

**MEF2C**

**MEF2C**

**DAPI**

**DAPI**

**Merged**

**Merged**

**Figure S9**

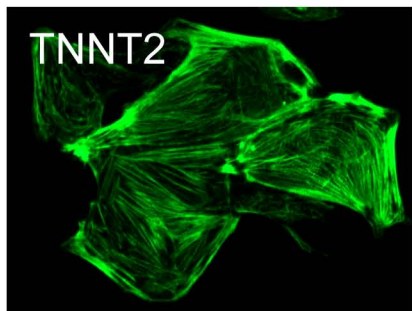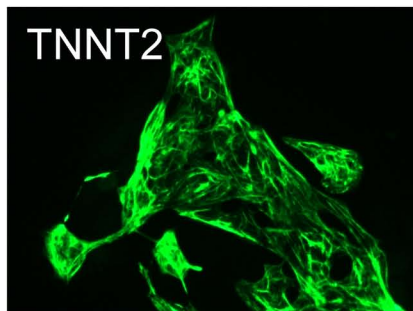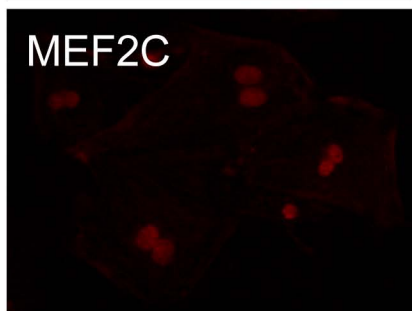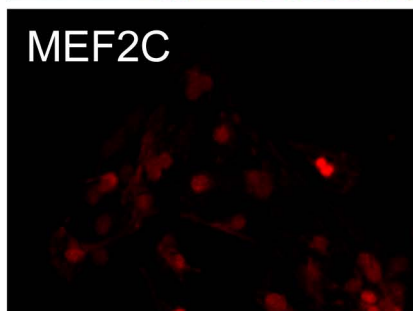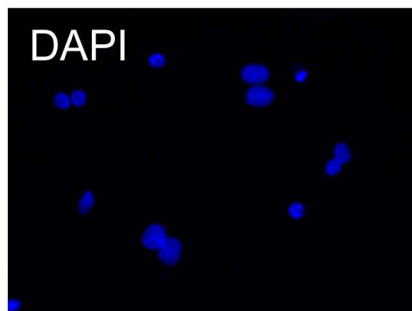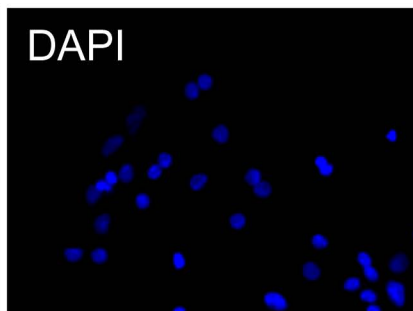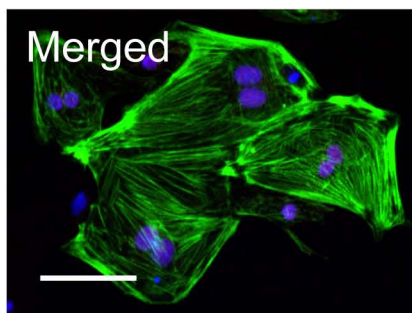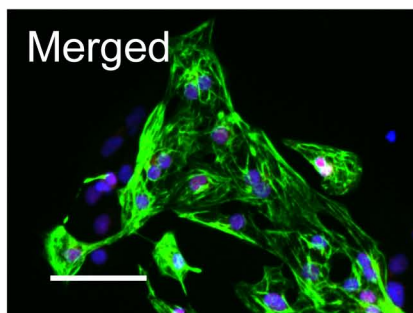

**KMOS**

**KMOS3**

**NESTIN**

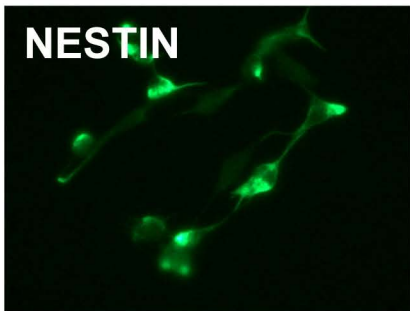

**NESTIN**

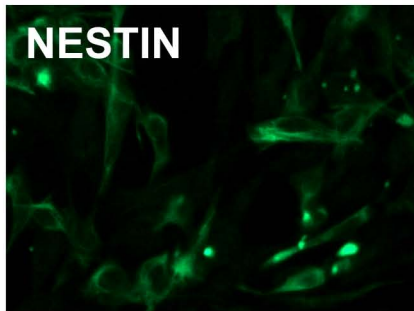

**SOX2**

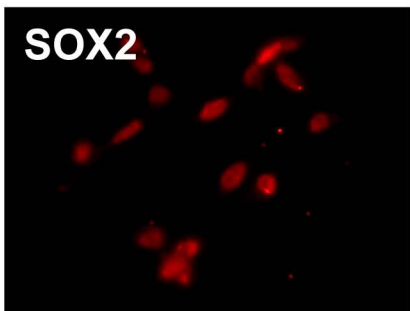

**SOX2**

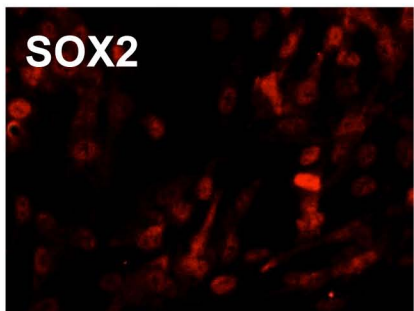

**DAPI**

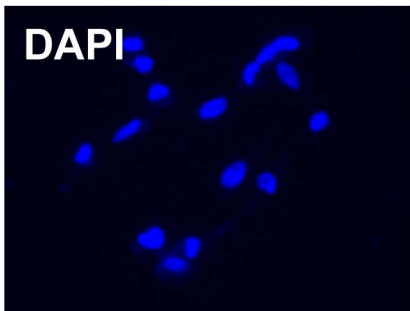

**DAPI**

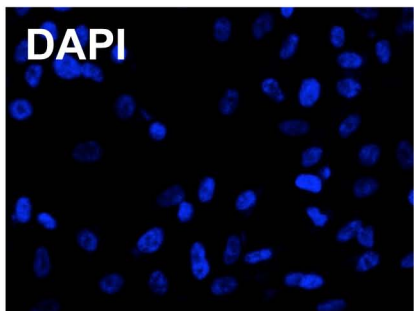

**Merged**

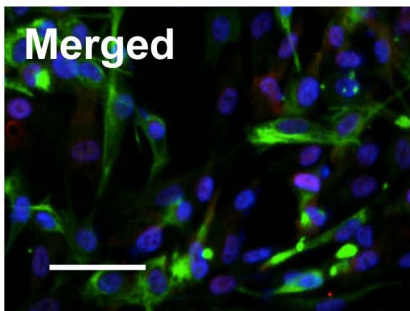

**Merged**

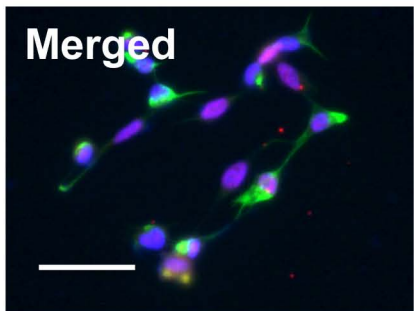

**Figure S10**

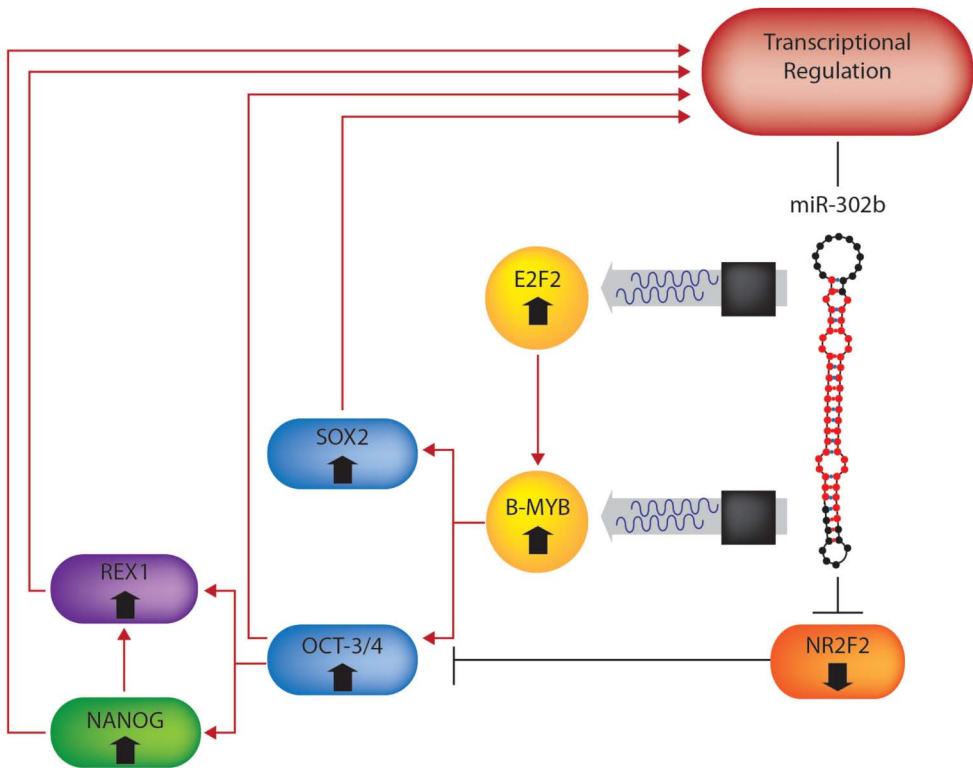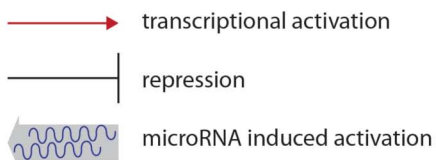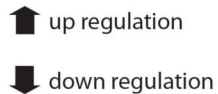

**Figure S11**

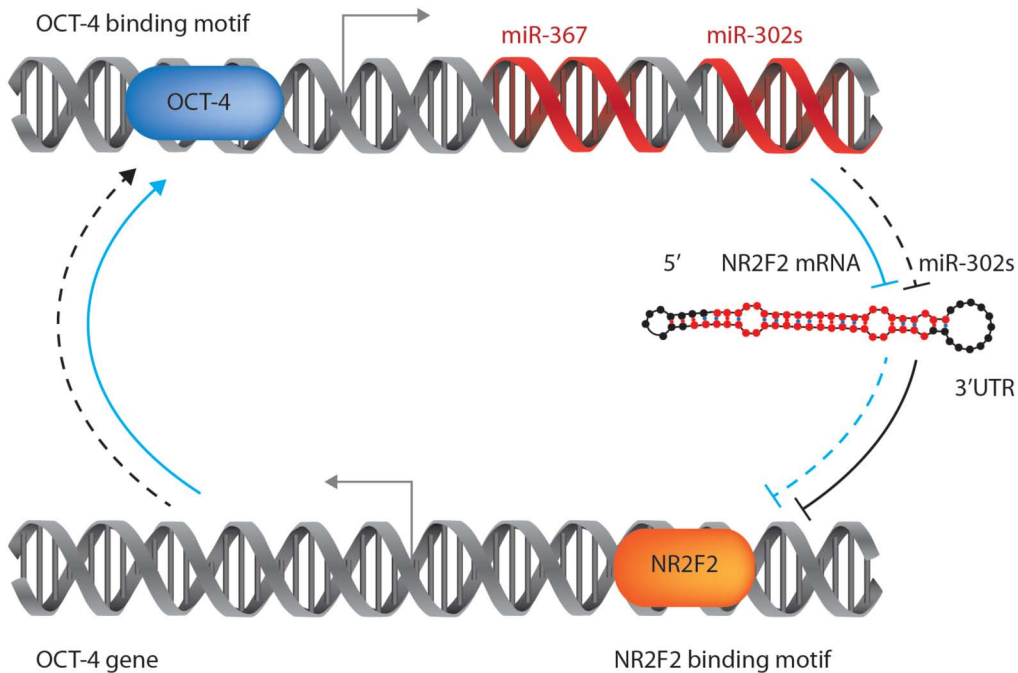

**Figure S12**
